# Supplementary material
Source: HighWire-hosted journal article supplement (https://jnm.snmjournals.org/highwire/filestream/93914/field_highwire_adjunct_files/2/Supplemental_figure_legends_for_jnm_44669.pdf)
Supplement: Supplemental_figure_legends_for_jnm_44669.pdf [file Supplemental_figure_legends_for_jnm_44669.pdf]

**FIGURE 1.** Side-by-side comparison of the Colin atlas and Brodmann's original parcellation.

**FIGURE 2.** 3D projections of node-by-node averages and intersubject SD computed from intensity-normalized (mean-scaled) individual CMRGlc across all 9 subjects, both without (left) and with (right) prior 2D smoothing of individual data.
